# Supplementary material for: Gender-Related Differences in Chronic Kidney Disease-Associated Vascular Calcification Risk and Potential Risk Mediators: A Scoping Review
Source: MDPI journal article supplement (doi:10.3390/healthcare9080979), 2021-08-01
Supplement: s1 [file s1]

**Supplementary Table S1.** Sex-related differences in the prevalence and/or severity of vascular calcification.

| Authors                  | Country              | Time | CKD stages        | Sample size | Findings | Data                                                                                                                                                                                                                | Calcification assessment method                                                                             | Ref   |
|--------------------------|----------------------|------|-------------------|-------------|----------|---------------------------------------------------------------------------------------------------------------------------------------------------------------------------------------------------------------------|-------------------------------------------------------------------------------------------------------------|-------|
| <i>Non-dialysis CKD</i>  |                      |      |                   |             |          |                                                                                                                                                                                                                     |                                                                                                             |       |
| Jansson <i>et al.</i>    | Sweden               | 2019 | 3-4               | 84          | Neutral  | With vs. without, male 79% vs. 67%, $p = 0.351$                                                                                                                                                                     | Abdominal aortic calcification on computed tomography                                                       | [65]  |
| Etta <i>et al.</i>       | India                | 2017 | 4-5               | 95          | Neutral  | With vs. without, 70% vs. 71.8%, $p = 0.58$                                                                                                                                                                         | Lumbar spine lateral radiography                                                                            | [54]  |
| Mizuri <i>et al.</i>     | Japan                | 2018 | 2-5               | 145         | Neutral  | Coronary calcification quartile 4 vs. 3 vs. 2 vs. 1, male 62.9% vs. 64.9% vs. 54.1% vs. 63.9%, $p > 0.05$<br>Iliac calcification quartile 4 vs. 3 vs. 2 vs. 4, male 58.3% vs. 65.8% vs. 68.6% vs. 52.8%, $p > 0.05$ | Coronary artery calcification (Agatston score) and common iliac artery calcification by computed tomography | [87]  |
| Fayed <i>et al.</i>      | Egypt                | 2019 | 5                 | 172         | Neutral  | Intimal vs. medial vs. none, male 37.9% vs. 64.9% vs. 58.1%                                                                                                                                                         | Arterial wall calcification based on intraoperative arterial biopsy                                         | [56]  |
| Chiu <i>et al.</i>       | United States        | 2010 | Proteinuric (1-5) | 225         | Neutral  | Group 4 (severe) vs. 3 vs. 2 vs. 1, male 61% vs. 64% vs. 47% vs. 45%, $p = 0.09$                                                                                                                                    | Coronary artery calcification (Agatston score)                                                              | [42]  |
| Bundy <i>et al.</i>      | United States        | 2019 | 2-4               | 1274        | Neutral  | Quartiles 4 vs. 3 vs. 2 vs. 1, female 46% vs. 45% vs. 49% vs. 47%                                                                                                                                                   | T <sub>50</sub> (propensity of calcification)                                                               | [114] |
| Chae <i>et al.</i>       | Korea                | 2018 | 1-5               | 1832        | Neutral  | Quartile 4 vs. 3 vs. 2 vs. 1, female 38.1% vs. 37.0% vs. 41.3% vs. 44.3%, $p = 0.101$                                                                                                                               | Pulse wave velocity                                                                                         | [115] |
| Abd Alamir <i>et al.</i> | United States        | 2015 | 2-3               | 2070        | Neutral  | With vs. without, male 49.6% vs. 54.5%, $p = 0.1$                                                                                                                                                                   | Mitral annular calcification by coronary computed tomography                                                | [112] |
| Bundy <i>et al.</i>      | United States (CRIC) | 2019 | 2-4               | 3404        | Neutral  | Quartile 1 (severe) vs. 2 vs. 3 vs. 4, female 47% vs. 48% vs. 44% vs. 41%, $p > 0.05$                                                                                                                               | T <sub>50</sub> (propensity of calcification)                                                               | [34]  |

|                                 |                |      |         |     |                  |                                                                                                                                    |                                                                                                       |       |
|---------------------------------|----------------|------|---------|-----|------------------|------------------------------------------------------------------------------------------------------------------------------------|-------------------------------------------------------------------------------------------------------|-------|
| Merjanian <i>et al.</i>         | United States  | 2003 | 3-5     | 32  | Male more severe | Male vs female, scores 619 vs. 232, $p < 0.001$                                                                                    | Coronary artery calcification (Agatston score)                                                        | [85]  |
| Di Iorio <i>et al.</i>          | Italy          | 2006 | 4-5, 5D | 44  | Male more severe | Scores >400 vs.<400, male 75% vs. 42%, $p = 0.05$                                                                                  | Coronary artery calcification (Agatston score)                                                        | [51]  |
| Tomiyama <i>et al.</i>          | Brazil         | 2010 | 2-4     | 50  | Male more common | With vs. without, male 79% vs. 47%, $p = 0.02$                                                                                     | Coronary artery calcification (Agatston score)                                                        | [105] |
| Porter <i>et al.</i>            | United Kingdom | 2007 | 3-4     | 112 | Male more common | In non-diabetic group, VC prevalence in male vs. female, 60% vs. 26%, $p = 0.003$                                                  | Coronary artery calcification (Agatston score)                                                        | [124] |
| Harada <i>et al.</i>            | Brazil         | 2014 | 2-5     | 117 | Male more severe | Score >0 vs. score =0, male 78.7% vs. 42.9%, $p < 0.001$                                                                           | Coronary artery calcification (Agatston score)                                                        | [58]  |
| Chue <i>et al.</i>              | United Kingdom | 2012 | 3       | 120 | Male more common | Male vs. Female, 67% vs. 43%, $p = 0.01$                                                                                           | Lumbar spine lateral radiography                                                                      | [44]  |
| Morena <i>et al.</i>            | France         | 2009 | 1-5     | 133 | Male more common | Severe vs. minor, 73.6% vs. 36.1%, $p < 0.0001$                                                                                    | Coronary artery calcification (Agatston score)                                                        | [88]  |
| Sigrist <i>et al.</i>           | United Kingdom | 2006 | 4-5D    | 134 | Male more severe | Tertiles 3 vs. 2 vs. 1, male 81% vs. 71% vs. 46%, $p < 0.001$                                                                      | Superficial femoral artery calcification by computed tomography                                       | [102] |
| Jiménez Villodres <i>et al.</i> | Spain          | 2018 | 3       | 139 | Male more common | With and without abdominal aortic calcification, male 80% vs. 63%, $p < 0.05$<br>With and without KI, male 69% vs. 72%, $p > 0.05$ | Lateral lumbar radiography (Kauppila score) and abdominal aortic calcification on computed tomography | [69]  |
| Zhou <i>et al.</i>              | Sweden         | 2018 | 1-5     | 151 | Male more common | Male vs. female: 76% vs. 69%, $p < 0.05$                                                                                           | Lateral lumbar radiography (Kauppila score)                                                           | [111] |

|                               |                           |      |         |      |                  |                                                                                                     |                                                                                                              |       |
|-------------------------------|---------------------------|------|---------|------|------------------|-----------------------------------------------------------------------------------------------------|--------------------------------------------------------------------------------------------------------------|-------|
| Dai <i>et al.</i>             | Sweden                    | 2020 | 5       | 152  | Male more severe | Moderate to extensive vs. no to minimal, male 81% vs. 56%, $p = 0.002$                              | Histopathology of epigastric artery calcification                                                            | [116] |
| Craver <i>et al.</i>          | Spain                     | 2013 | 3-4     | 178  | Male more severe | Scores >5 vs. 1-5 vs. 0, male 83% vs. 80% vs. 70%, $p = 0.017$                                      | Lateral lumbar radiography (Kauppila score)                                                                  | [48]  |
| Lioufas <i>et al.</i>         | Multicenter (IMPROVE-CKD) | 2020 | 3b-4    | 278  | Male more common | With vs. without, male 73% vs. 55%, $p = 0.02$                                                      | Abdominal aortic calcification by computed tomography                                                        | [79]  |
| Wang <i>et al.</i>            | Hong Kong                 | 2014 | 3-5     | 300  | Male more severe | Scores $\geq 400$ vs. 100–399 vs. 1–99 vs. 0, male 77.3% vs. 56.9% vs. 57.5% vs. 38.7%, $p < 0.001$ | Coronary artery calcification (Agatston score)                                                               | [107] |
| Kestenbaum <i>et al.</i>      | United States             | 2009 | 3-5     | 562  | Male more common | With vs. without, male 45% vs. 29%, $p < 0.001$                                                     | Coronary artery calcification (Agatston score)                                                               | [119] |
| Lee <i>et al.</i>             | Korea                     | 2006 | 2-5     | 1078 | Male more common | With vs. without, male 73.7% vs. 54.4%, $p < 0.001$                                                 | Coronary artery calcification (Agatston score)                                                               | [78]  |
| Chen <i>et al.</i>            | United States             | 2017 | 1-4     | 1541 | Male more severe | Scores >100 vs. 0-100 vs. 0, male 65.2% vs. 54.3% vs. 41.7%, $p < 0.001$                            | Coronary artery calcification (Agatston score)                                                               | [41]  |
| He <i>et al.</i>              | United States             | 2012 | 2-4     | 2018 | Male more severe | Score >100 vs. 0-100 vs. 0, male 63.6% vs. 53.3% vs. 41.9%, $p < 0.0001$                            | Coronary artery calcification (Agatston score)                                                               | [60]  |
| <i>Dialysis-dependent CKD</i> |                           |      |         |      |                  |                                                                                                     |                                                                                                              |       |
| Lockhart <i>et al.</i>        | United States             | 2004 | 5D (HD) | 32   | Neutral          | Scores high vs. low, male 67% vs. 42%, $p = 0.28$                                                   | Abdominal aorta, common iliac, external iliac and common femoral artery calcification on computed tomography | [81]  |
| Liu <i>et al.</i>             | China                     | 2016 | 5D      | 41   | Neutral          | With vs. without, male 66.67% vs. 59.38%, $p = 0.993$                                               | Immunohistochemical analysis of radial                                                                       | [80]  |

|                            |         |      |           |    |         |                                                                                          |                                                                                     |       |
|----------------------------|---------|------|-----------|----|---------|------------------------------------------------------------------------------------------|-------------------------------------------------------------------------------------|-------|
|                            |         |      |           |    |         |                                                                                          | arterial calcium deposition                                                         |       |
| Al-Rifai <i>et al.</i>     | Lebanon | 2011 | 5D (HD)   | 43 | Neutral | No association between VC and gender                                                     | Hand X-rays                                                                         | [28]  |
| Roca-Tey <i>et al.</i>     | Spain   | 2009 | 5D (HD)   | 45 | Neutral | With vs. without, male 81.5% vs. 55.6%, $p = 0.09$                                       | Arteriovenous fistula calcification on computed tomography                          | [99]  |
| Kim <i>et al.</i>          | Korea   | 2019 | 5D        | 47 | Neutral | With vs. without, male 83.3% vs. 69%, $p = 0.324$                                        | AVF anastomotic segment medial calcification by ultrasound                          | [72]  |
| Niu <i>et al.</i>          | China   | 2019 | 5D (HD)   | 56 | Neutral | Progression score >500 vs. 100–500 vs. <100, male 70.7% vs. 73.7% vs. 59.3%, $p = 0.572$ | Coronary artery calcification (Agatston score)                                      | [92]  |
| Gunen Yilmaz <i>et al.</i> | Turkey  | 2019 | 5D (HD)   | 60 | Neutral | With vs. without, male 53.3% vs. 53.3%, $p = 0.25$                                       | Carotid artery calcification on plain radiography and ultrasound                    | [57]  |
| Lee <i>et al.</i>          | Taiwan  | 2019 | 5D (HD)   | 61 | Neutral | With vs. without, male 52% vs. 37%, $p = 0.240$                                          | Lateral lumbar radiography (Kauppila score)                                         | [77]  |
| Stróżecki <i>et al.</i>    | Poland  | 2005 | 5D (HD)   | 65 | Neutral | With vs. without, male 43.8% vs. 48.5%, $p > 0.05$                                       | Calcified cardiac valves on ultrasound                                              | [103] |
| Maharem <i>et al.</i>      | Egypt   | 2013 | 5, 5D, 5T | 73 | Neutral | VC presence vs. absence, male 57.9% vs. 31.6%, $p = 0.056$                               | Pelvic and hand plain radiography                                                   | [83]  |
| Petrovic <i>et al.</i>     | Serbia  | 2020 | 5D (HD)   | 80 | Neutral | PWV >8.8 vs. ≤8.8 m/s, male 20% vs. 14%, $p = 0.119$                                     | Pulse wave velocity                                                                 | [94]  |
| Moldovan <i>et al.</i>     | Romania | 2011 | 5D (HD)   | 81 | Neutral | With vs. without, male 63.2% vs. 41.7%, $p = 0.44$                                       | Plain radiography of pelvis and hands (Adragao score)                               | [122] |
| Jean <i>et al.</i>         | France  | 2012 | 5D (HD)   | 85 | Neutral | Progression vs. stable, male 56% vs. 48%, $p > 0.05$                                     | Multi-site plain radiography involving pelvis, lumbar, knee, right hand, right arm, | [68]  |

|                          |               |      |         |     |         |                                                                                                                            |                                                                                                                        |       |
|--------------------------|---------------|------|---------|-----|---------|----------------------------------------------------------------------------------------------------------------------------|------------------------------------------------------------------------------------------------------------------------|-------|
|                          |               |      |         |     |         |                                                                                                                            | chest, skull, and<br>orthopantomogram                                                                                  |       |
| Chao <i>et al.</i>       | Taiwan        | 2017 | 5D (HD) | 88  | Neutral | With vs. without, male 59% vs. 66%, $p = 0.54$                                                                             | Aortic arch<br>calcification on chest<br>radiography                                                                   | [38]  |
| Chandra <i>et al.</i>    | India         | 2020 | 5D      | 90  | Neutral | With vs. without, male 67.5% vs. 62%, $p = 0.59$                                                                           | Coronary artery<br>calcification (Agatston<br>score) and thoracic<br>aortic calcification by<br>computed<br>tomography | [35]  |
| Ribeiro <i>et al.</i>    | Portugal      | 1998 | 5D (HD) | 92  | Neutral | No difference between genders                                                                                              | Calcified cardiac<br>valves on computed<br>tomography                                                                  | [98]  |
| Chao <i>et al.</i>       | Taiwan        | 2020 | 5D (HD) | 96  | Neutral | With vs. without, male 47% vs. 43%, $p = 0.711$                                                                            | Aortic arch<br>calcification on chest<br>radiography                                                                   | [37]  |
| Wang <i>et al.</i>       | China         | 2019 | 5D (HD) | 108 | Neutral | Severe vs. mild vs. none, male 30% vs.<br>23.1% vs. 43.8%, $p = 0.08$                                                      | Abdominal aortic<br>calcification<br>(Kauppila score)                                                                  | [125] |
| Avramovski <i>et al.</i> | Macedonia     | 2019 | 5D      | 112 | Neutral | No association between VC and gender                                                                                       | Lumbar spine lateral<br>radiography                                                                                    | [30]  |
| Hou <i>et al.</i>        | Taiwan        | 2019 | 5D (HD) | 120 | Neutral | High vs. low, male 52.8% vs. 47.8%, $p = 0.851$                                                                            | Pulse wave velocity                                                                                                    | [61]  |
| Al Humoud <i>et al.</i>  | Kuwait        | 2005 | 5D      | 129 | Neutral | With vs. without, male 58.8% vs. 45.3%, $p = 0.175$                                                                        | Hand X-rays                                                                                                            | [62]  |
| Fabbian <i>et al.</i>    | Italy         | 2005 | 5D (HD) | 132 | Neutral | No difference between genders                                                                                              | Aortic arch<br>calcification on chest<br>radiography                                                                   | [55]  |
| Bellasi <i>et al.</i>    | United States | 2012 | 5D (HD) | 141 | Neutral | Cardiovascular calcification index score 8–<br>11 vs. 5–7 vs. 3–4 vs. 0–2, male 62% vs.<br>39% vs. 52% vs. 49%, $p = 0.57$ | Lumbar spine lateral<br>radiography<br>(Kaupilla score) and<br>echocardiography-<br>derived valve<br>calcification     | [33]  |

|                        |               |      |         |     |         |                                                                                                                         |                                                                                                                                  |       |
|------------------------|---------------|------|---------|-----|---------|-------------------------------------------------------------------------------------------------------------------------|----------------------------------------------------------------------------------------------------------------------------------|-------|
| Ballotta <i>et al.</i> | Italy         | 2004 | 5D      | 143 | Neutral | With vs. without, male 78% vs. 74%, $p = 0.59$                                                                          | Calcified vessels determined intra-operatively                                                                                   | [32]  |
| Raggi <i>et al.</i>    | United States | 2011 | 5D (HD) | 144 | Neutral | Number of calcified valves 2 vs. 1 vs. 0, male 61.1% vs. 44.7% vs. 45.9%, $p = 0.19$                                    | Calcified cardiac valves on computed tomography                                                                                  | [96]  |
| Muntner <i>et al.</i>  | United States | 2007 | 5D (HD) | 148 | Neutral | Score $\geq 1000$ vs. 400-999 vs. 100-399 vs. 1-99 vs. 0, female 45.5% vs. 46.4% vs. 50% vs. 61.8% vs. 50%, $p = 0.184$ | Coronary artery calcification (Agatston score)                                                                                   | [123] |
| He <i>et al.</i>       | China         | 2018 | 5D (HD) | 150 | Neutral | With vs. without, male 61.1% vs. 76.2%, $p = 0.099$                                                                     | Lateral lumbar radiography (Kauppila score)                                                                                      | [59]  |
| Niu <i>et al.</i>      | China         | 2019 | 5D (PD) | 150 | Neutral | With vs. without, male 51.65% vs. 49.15%, $p = 0.765$                                                                   | Plain films of lateral abdomen, frontal pelvic, and both hands for abdominal aorta, iliac, femoral, radial, and digital arteries | [91]  |
| London <i>et al.</i>   | France        | 2013 | 5D (HD) | 155 | Neutral | With vs. without, male-to-female ratio 1.38 vs. 1.44, $p > 0.05$                                                        | Common carotid artery calcification by ultrasound                                                                                | [82]  |
| Kim <i>et al.</i>      | Korea         | 2011 | 5D      | 184 | Neutral | Progression vs. stable, 44% vs. 41%, $p = 0.657$                                                                        | Aortic arch calcification on chest radiography                                                                                   | [73]  |
| Wu <i>et al.</i>       | Taiwan        | 2017 | 5D (PD) | 190 | Neutral | Grade 3 vs. 2 vs. 1 vs. 0, male 37.0% vs. 58.3% vs. 40.4% vs. 43.8%, $p = 0.293$                                        | Aortic arch calcification on chest radiography                                                                                   | [109] |
| Wang <i>et al.</i>     | Hong Kong     | 2003 | 5D (PD) | 192 | Neutral | With vs. without, male 50.0% vs. 51.5%, $p = 0.842$                                                                     | Calcified cardiac valves on ultrasound                                                                                           | [108] |
| Jean <i>et al.</i>     | France        | 2016 | 5D (HD) | 227 | Neutral | Group 3 (severe) vs. 2 vs. 1, male 59.7% vs. 55.6% vs. 59.2%, $p > 0.05$                                                | Lumbar spine lateral radiography                                                                                                 | [66]  |
| Chen <i>et al.</i>     | Sweden        | 2017 | 5D, 5T  | 240 | Neutral | Score $> 100$ vs. $\leq 100$ , male 68% vs. 57%, $p = 0.052$                                                            | Coronary artery calcification (Agatston score)                                                                                   | [40]  |

|                              |               |      |          |     |                                     |                                                                                                                                                                                                           |                                                                |       |
|------------------------------|---------------|------|----------|-----|-------------------------------------|-----------------------------------------------------------------------------------------------------------------------------------------------------------------------------------------------------------|----------------------------------------------------------------|-------|
| Chang <i>et al</i>           | South Korea   | 2012 | 5D (HD)  | 289 | Neutral                             | Severe vs. modest calcification, male<br>41.8% vs. 44.7%, $p = 0.066$                                                                                                                                     | Lumbar spine lateral<br>radiography                            | [36]  |
| Floege <i>et al.</i>         | Multicenter   | 2010 | 5D (HD)  | 360 | Neutral                             | Score $\geq 1000$ vs. 400-999 vs. 30-399, 65%<br>vs. 55% vs. 51%                                                                                                                                          | Coronary artery<br>calcification (Agatston<br>score)           | [117] |
| Lee <i>et al</i>             | Taiwan        | 2014 | 5D (HD)  | 712 | Neutral                             | Group 3 (severe) vs. 2 vs. 1 vs. none, male<br>38.1% vs. 42.2% vs. 45.7% vs. 43.8%, $p =$<br>0.606                                                                                                        | Aortic arch<br>calcification on chest<br>radiography           | [76]  |
| Ahmed <i>et al.</i>          | United States | 2001 | 5D       | 10  | Female more<br>common               | Male vs. female, 10% vs. 90%, $p < 0.02$                                                                                                                                                                  | Calciphylaxis on skin<br>biopsy                                | [26]  |
| Nitta <i>et al</i>           | Japan         | 2018 | 5D (HD)  | 216 | Female more<br>severe               | Group 3 (severe) vs. 2 vs. no calcification,<br>female 47.5% vs. 40.9% vs. 23.1%, $p <$<br>0.0001                                                                                                         | Aortic arch<br>calcification on chest<br>radiography           | [90]  |
| Komatsu <i>et al</i>         | Japan         | 2014 | 5D (HD)  | 301 | Female common                       | Grade 2+3 vs. 1 vs. no calcification, male<br>58.7% vs. 56.3% vs. 77.8%, $p = 0.0009$                                                                                                                     | Aortic arch<br>calcification on chest<br>radiography           | [75]  |
| Maia <i>et al.</i>           | Brazil        | 2018 | 5D (HD)  | 309 | Female more<br>common               | With vs. without, male 44.9% vs. 60.8%, $p$<br>$= 0.039$                                                                                                                                                  | Carotid artery<br>calcification on<br>panoramic<br>radiographs | [120] |
| Disthabanchong <i>et al.</i> | Thailand      | 2018 | 2-5D, 5T | 419 | Female more<br>severe<br>(subgroup) | AAC score $> 6$ vs. $\leq 6$ in CKD stage 2 -5,<br>male 44.4% vs. 62.6, $p < 0.05$<br>In male with stage 5D, 50% vs. 50.5% ( $P >$<br>0.05)<br>In male with stage 5T, 67.9% vs. 58.5% ( $p$<br>$> 0.05$ ) | Lateral lumbar<br>radiography<br>(Kauppila score)              | [52]  |
| El Amrani <i>et al.</i>      | Morocco       | 2015 | 5D (HD)  | 49  | Male more<br>common                 | With vs. without, male 64.7% vs. 26,6 %, $p$<br>$= 0.014$                                                                                                                                                 | Coronary artery<br>calcification (Agatston<br>score)           | [53]  |
| Wang <i>et al.</i>           | China         | 2014 | 5D (HD)  | 77  | Male more<br>common                 | Score $> 400$ vs. 11-400 vs. $< 10$ , male 67.8%<br>vs. 53.8% vs. 26.1%, $p < 0.001$                                                                                                                      | Coronary artery<br>calcification (Agatston<br>score)           | [126] |
| Jankovic <i>et al</i>        | Serbia        | 2017 | 5D (HD)  | 90  | Male more<br>common                 | With vs. without, male 66.1% vs. 35.3%, $p$<br>$= 0.008$                                                                                                                                                  | Forearm AVF plain<br>radiography                               | [63]  |

|                          |           |      |         |     |                                        |                                                                                                                                                                                    |                                                                                                                        |       |
|--------------------------|-----------|------|---------|-----|----------------------------------------|------------------------------------------------------------------------------------------------------------------------------------------------------------------------------------|------------------------------------------------------------------------------------------------------------------------|-------|
| Jankovic <i>et al.</i>   | Serbia    | 2015 | 5D (HD) | 90  | Male more severe                       | Scores 8-11 vs. 4-7 vs. 0-3, 76.7% vs. 50% vs. 38.9%, $p = 0.008$                                                                                                                  | Plain radiography of pelvis and hands (Adragao score) + forearm AVF plain radiography                                  | [64]  |
| Mazzaferro <i>et al.</i> | Italy     | 2007 | 5D, 5T  | 100 | Male more severe                       | Male dialysis vs. male transplant vs. female dialysis vs. female transplant, 1944 vs. 945 vs. 157 vs. 35, $p < 0.02$                                                               | Coronary artery calcification (Agatston score)                                                                         | [84]  |
| Adragao <i>et al.</i>    | Portugal  | 2004 | 5D (HD) | 123 | Male more severe                       | Score $\geq 3$ vs. $< 3$ , female 22% vs. 58%, $p < 0.001$                                                                                                                         | Plain radiography of pelvis and hands (Adragao score)                                                                  | [113] |
| Coen <i>et al.</i>       | Italy     | 2006 | 5D (HD) | 132 | Male more severe                       | Score $> 1000$ vs. 400-1000 vs. 1-400 vs. 0-1, male 74.6% vs. 61.9% vs. 61.3% vs. 38.4%<br>Scores correlated with male gender ( $p < 0.05$ )                                       | Coronary artery calcification (Agatston score)                                                                         | [46]  |
| Yoshikawa <i>et al.</i>  | Japan     | 2013 | 5D (HD) | 134 | Male more common                       | $\beta = -0.20$ , $p = 0.008$                                                                                                                                                      | Abdominal aorta calcification on computed tomography                                                                   | [110] |
| Kimura <i>et al.</i>     | Japan     | 1999 | 5D (HD) | 137 | Male more common early during lifetime | With calcification during age 40s, male vs. female 4.0% vs. 3.7%, $p < 0.01$                                                                                                       | Abdominal aortic calcification by computed tomography                                                                  | [74]  |
| Gelev <i>et al.</i>      | Macedonia | 2008 | 5D (HD) | 150 | Male more common, especially intimal   | VC prevalence: male vs. female, 87.9% vs. 61.0%, $p < 0.03$<br>Intimal VC: male vs. female, 53.8% vs. 32.2%, $p < 0.02$<br>Medial VC: male vs. female, 34.1% vs. 28.8%, $p > 0.05$ | Pelvic antero-posterior radiography                                                                                    | [118] |
| Jean <i>et al.</i>       | France    | 2009 | 5D (HD) | 161 | Male more severe                       | High score (3) vs. no (score 0), male 77% vs. 45%, $p < 0.05$                                                                                                                      | Multi-site plain radiography involving pelvis, lumbar, knee, right hand, right arm, chest, skull, and orthopantomogram | [67]  |



|                                 |                     |      |         |     |                                  |                                                                                                                         |                                                                                                             |       |
|---------------------------------|---------------------|------|---------|-----|----------------------------------|-------------------------------------------------------------------------------------------------------------------------|-------------------------------------------------------------------------------------------------------------|-------|
| Asci <i>et al.</i>              | Turkey              | 2010 | 5D (HD) | 207 | Male more common and more severe | Score >0 vs. 0, male 57% vs. 41%, $p = 0.05$<br>Score >400 vs. 101-400 vs. 1-100, male 61% vs. 72% vs. 38%, $p = 0.005$ | Coronary artery calcification (Agatston score)                                                              | [29]  |
| Schlieper <i>et al.</i>         | Serbia              | 2008 | 5D (HD) | 212 | Male more common                 | With vs. without, male 78% vs. 47%, $p < 0.0001$                                                                        | Vascular access calcification on plain radiography                                                          | [100] |
| Turan <i>et al.</i>             | Turkey              | 2016 | 5D (HD) | 224 | Male more severe                 | Group 4 (severe) vs. 3. vs. 2 vs. no calcification, male 56% vs. 59% vs. 38% vs. 41%, $p = 0.003$                       | Coronary artery calcification (Agatston score)                                                              | [106] |
| Coll <i>et al.</i>              | Spain               | 2011 | 5D      | 232 | Male more common                 | With vs. without linear calcification, male 65% vs. 41%, $p = 0.01$                                                     | Vascular ultrasound for carotid, femoral, or brachial arteries                                              | [47]  |
| Charitaki <i>et al.</i>         | United Kingdom      | 2014 | 5D (HD) | 303 | Male more severe                 | Correlation with female, $r = -0.124$ , $p = 0.031$                                                                     | Pulse wave velocity                                                                                         | [39]  |
| Bae <i>et al.</i>               | Korea (multicenter) | 2016 | 5D (HD) | 423 | Male more common and more severe | Male vs. female, positive CAC 69.37% vs. 53.95%, $p = 0.001$<br>Male vs. female, CAC scores 44.1 vs. 5.15, $p = 0.0041$ | Coronary artery calcification (Agatston score)                                                              | [31]  |
| Renaud <i>et al.</i>            | France              | 1988 | 5D (HD) | 24  | Male more likely to progress     | Correlation coefficient for male vs. annual calcification increase = 1.97, $p < 0.01$                                   | Lumbosacral radiography for linear calcifications involving the abdominal aorta, iliac and femoral arteries | [97]  |
| Tangvoraphonkchai <i>et al.</i> | United States       | 2019 | 5D (PD) | 24  | Male more likely to progress     | Stable PWV vs. increased PWV, male 33% vs. 75%                                                                          | Pulse wave velocity                                                                                         | [104] |
| Alayoud <i>et al.</i>           | France              | 2020 | 5D (HD) | 28  | Male more likely to progress     | Progression vs. stable, male 83.3% vs. 36.4%, $p = 0.02$                                                                | Coronary artery calcification (Agatston score)                                                              | [27]  |
| Choi <i>et al.</i>              | Korea               | 2019 | 5D (HD) | 97  | Male more likely to progress     | Progression vs. stable, male 50.9% vs. 29.5%, $p = 0.033$                                                               | Lateral lumbar radiography (Kauppila score)                                                                 | [43]  |
| Okamoto <i>et al.</i>           | Japan               | 2018 | 5D (HD) | 184 | Male more likely to progress     | Annual progression rapid vs. slow, male 53% vs. 27%, $p = 0.008$                                                        | Abdominal aorta calcification on                                                                            | [93]  |

|                        |               |      |    |     |                                    |                                                                                                                          | computed tomography                                                                            |       |
|------------------------|---------------|------|----|-----|------------------------------------|--------------------------------------------------------------------------------------------------------------------------|------------------------------------------------------------------------------------------------|-------|
| <i>Stage 5T</i>        |               |      |    |     |                                    |                                                                                                                          |                                                                                                |       |
| Miyatake <i>et al.</i> | Japan         | 2020 | 5T | 50  | Neutral                            | Male vs. female 1.72 vs. 0.00, $p > 0.05$                                                                                | Abdominal aortic calcification by computed tomography                                          | [86]  |
| DeLoach <i>et al.</i>  | United States | 2009 | 5T | 112 | Neutral                            | With vs. without, male 68.4% vs. 58.1%, $p = 0.29$                                                                       | Coronary artery calcification (Agatston score) and aortic calcification by computed tomography | [50]  |
| Claes <i>et al.</i>    | Belgium       | 2013 | 5T | 115 | Neutral                            | Prevalence male vs. female, 61% vs. 50.7%, $p = 0.16$                                                                    | Lateral lumbar radiography (Kauppila score)                                                    | [45]  |
| Munguia <i>et al.</i>  | Spain         | 2015 | 5T | 119 | Neutral                            | With vs. without, 70% vs. 62.3%, $p = 0.384$                                                                             | Lateral lumbar radiography (Kauppila score)                                                    | [89]  |
| Davis <i>et al.</i>    | United States | 2016 | 5T | 131 | Neutral                            | Regression between scores and male gender, $r = -0.16$ -0.051, $p > 0.05$                                                | Iliac arteries calcification by computed tomography                                            | [49]  |
| Keyzer <i>et al.</i>   | Netherlands   | 2015 | 5T | 699 | Neutral                            | Tertile 1 (severe) vs. 2 vs. 3, male 58% vs. 55% vs. 57%, $p = 0.73$                                                     | T <sub>50</sub> (propensity of calcification)                                                  | [71]  |
| Qureshi <i>et al.</i>  | Sweden        | 2015 | 5T | 89  | Male more severe                   | Moderate-severe vs. non-minimal, male 76% vs. 54%, $p = 0.04$                                                            | Biopsy-verified calcification in epigastric arteries                                           | [95]  |
| Shu <i>et al.</i>      | Taiwan        | 2012 | 5T | 99  | Male more severe                   | Group 5 (severe) vs. 4 vs. 3 vs. 2 vs. 1, male 66.7% vs. 53.3% vs. 63.6% vs. 65.0 vs. 29.3%, $p = 0.027$                 | Coronary artery calcification (Agatston score)                                                 | [101] |
| Kahn <i>et al.</i>     | Austria       | 2017 | 5T | 205 | Male more severe, segment-specific | Aorta: male vs. female, 2.0 vs. 1.5, $p = 0.511$<br>Right common iliac artery: male vs. female, 1.0 vs. 1.0, $p = 0.139$ | Pelvic computed tomography                                                                     | [70]  |

|                        |         |      |    |     |                              |                                                                                                                                     |                                                                                                         |       |
|------------------------|---------|------|----|-----|------------------------------|-------------------------------------------------------------------------------------------------------------------------------------|---------------------------------------------------------------------------------------------------------|-------|
|                        |         |      |    |     |                              | Total iliac artery: male vs. female, 1.00 vs. 0.50, $p = 0.003$<br>External iliac artery: male vs. female, 1.0 vs. 0.0, $p < 0.001$ |                                                                                                         |       |
| Maréchal <i>et al.</i> | Belgium | 2012 | 5T | 197 | Male more likely to progress | Rapid progressor vs. slow progressor vs. non-progressor, male 66% vs. 65% bs. 45%, $p = 0.02$                                       | Coronary artery calcification (Agatston score) and thoracic artery calcification by computed tomography | [121] |

*AAC, abdominal aortic calcification; CKD, chronic kidney disease; HD, hemodialysis; LAD, left anterior descending; PD, peritoneal dialysis; VC, vascular calcification*

**Supplementary Table S2.** Sex-related risk of vascular calcification in existing studies.

| Authors                       | Country        | Time | CKD stages | Sample size | Findings                                | Results                                                                                                                | Calcification assessment method                                 | Ref   |
|-------------------------------|----------------|------|------------|-------------|-----------------------------------------|------------------------------------------------------------------------------------------------------------------------|-----------------------------------------------------------------|-------|
| <i>Non-dialysis CKD</i>       |                |      |            |             |                                         |                                                                                                                        |                                                                 |       |
| Filgueira <i>et al.</i>       | Brazil         | 2011 | 2-4        | 72          | Neutral                                 | Female OR 0.149, $p = 0.82$                                                                                            | Coronary artery calcification (Agatston score)                  | [132] |
| Vipattawat <i>et al.</i>      | Thailand       | 2014 | 5, 5D,5T   | 261         | Neutral                                 | For 5T patients, OR 2.49 (0.87–7.14), $p = 0.09$<br>For 5 and 5D patients, OR 2.02 (0.71–5.78), $p = 0.19$             | Pelvic and lumbar spine lateral radiography                     | [153] |
| Abd Alamir <i>et al.</i>      | United States  | 2015 | 2-3        | 2070        | Neutral                                 | Female OR 1.21 (0.94–1.56)                                                                                             | Mitral annular calcification by coronary computed tomography    | [112] |
| Porter <i>et al.</i>          | United Kingdom | 2007 | 3-4        | 112         | Male at risk                            | Male OR 43.713 (2.92–654.0), $p = 0.006$                                                                               | Coronary artery calcification (Agatston score)                  | [124] |
| Stavroulopoulos <i>et al.</i> | United Kingdom | 2011 | 3-4        | 112         | Male at risk for progression            | Progression at 2-yr, male OR 27.808 (1.625–475.97), $p = 0.022$                                                        | Coronary artery calcification (Agatston score)                  | [149] |
| Harada <i>et al.</i>          | Brazil         | 2014 | 2-5        | 117         | Male at risk                            | Male OR 4.92 (2.07–11.70), $p < 0.01$                                                                                  | Coronary artery calcification (Agatston score)                  | [58]  |
| Chue <i>et al.</i>            | United Kingdom | 2012 | 3          | 120         | Male at risk                            | Female $\beta = -0.34$ (-13.45– -4.48)                                                                                 | Lumbar spine lateral radiography                                | [44]  |
| Morena <i>et al.</i>          | France         | 2009 | 1-5        | 133         | Male at risk                            | Male OR 4.95 (2.36–10.37), $p < 0.0001$                                                                                | Coronary artery calcification (Agatston score)                  | [88]  |
| Sigrist <i>et al.</i>         | United Kingdom | 2007 | 4-5D       | 134         | Male at risk for progression            | For calcification progression at 2-yr, male OR 8.82 (1.82 to 42.65), $p = 0.007$                                       | Superficial femoral artery calcification by computed tomography | [102] |
| Sigrist <i>et al.</i>         | United Kingdom | 2006 | 4-5D       | 134         | Male at risk                            | Female $\beta = -2.108$ , $p < 0.001$                                                                                  | Superficial femoral artery calcification by computed tomography | [148] |
| Manghat <i>et al.</i>         | United Kingdom | 2011 | 1-4        | 145         | Neutral, but male at risk (in subgroup) | Overall, male $\beta = 0.06$ , $p = 0.54$<br>In those with CKD stage 4, male $\beta = 0.29$ , $t = 2.04$ , $p = 0.049$ | Pulse wave velocity based on a stiffness index                  | [139] |
| Golembiewska <i>et al.</i>    | Sweden         | 2020 | 5, 5D      | 149         | Male at risk                            | Male OR 4.4 (1.6–11.1), $p = 0.003$                                                                                    | Inferior epigastric artery histopathology calcification grading | [134] |

|                               |                |      |                   |      |                                      |                                                                                                                                                                                                         |                                                                                                                        |       |
|-------------------------------|----------------|------|-------------------|------|--------------------------------------|---------------------------------------------------------------------------------------------------------------------------------------------------------------------------------------------------------|------------------------------------------------------------------------------------------------------------------------|-------|
| Dai <i>et al.</i>             | Sweden         | 2020 | 5                 | 152  | Male at risk                         | Male OR 6.67 (2.53–17.58)                                                                                                                                                                               | Histopathology of epigastric artery calcification                                                                      | [116] |
| Craver <i>et al.</i>          | Spain          | 2013 | 3-4               | 178  | Male at risk                         | For AAC severity, male $\beta = 1.237$ (0.058-2.417), $p = 0.04$<br>For severe AAC, in all patients, male OR 4.218 (1.403-14.207), $p = 0.014$<br>For severe AAC, in eGFR < 30: OR 4.167 (1.050-20.178) | Abdominal aortic calcification (Kauppila score)                                                                        | [48]  |
| Chiu <i>et al.</i>            | United States  | 2010 | Proteinuric (1-5) | 225  | Male at risk                         | Male with significantly higher probability of more severe VC ( $p = 0.01$ )                                                                                                                             | Coronary artery calcification (Agatston score)                                                                         | [42]  |
| Kestenbaum <i>et al.</i>      | United States  | 2009 | 3-5               | 562  | Male at risk but not for progression | For VC presence, incidence rate ratio (IRR) 2.27 (1.26–4.09), $p = 0.006$<br>For VC progression, incidence rate ratio 1.10 (0.84-1.42), $p = 0.5$                                                       | Coronary artery calcification (Agatston score)                                                                         | [119] |
| Budoff <i>et al.</i>          | United States  | 2011 | 2-3A              | 1908 | Male at risk                         | Female OR 0.43 (0.35-0.53)                                                                                                                                                                              | Coronary artery calcification (Agatston score)                                                                         | [128] |
| <i>Dialysis-dependent CKD</i> |                |      |                   |      |                                      |                                                                                                                                                                                                         |                                                                                                                        |       |
| Fayed <i>et al.</i>           | Egypt          | 2019 | 5D (HD)           | 81   | Neutral                              | Male $\beta = 0.088$ , $p = 0.695$                                                                                                                                                                      | Abdominal aortic calcification by computed tomography                                                                  | [131] |
| Pateinakis <i>et al.</i>      | Greece         | 2013 | 5D (HD)           | 81   | Neutral                              | $\beta = -0.128$ , $p = 0.15$                                                                                                                                                                           | Pulse wave velocity                                                                                                    | [144] |
| Jean <i>et al.</i>            | France         | 2012 | 5D (HD)           | 85   | Neutral                              | For calcification progression, female OR 0.51 (0.185–1.426), $p = 0.2$                                                                                                                                  | Multi-site plain radiography involving pelvis, lumbar, knee, right hand, right arm, chest, skull, and orthopantomogram | [68]  |
| Wang <i>et al.</i>            | China          | 2019 | 5D (HD)           | 108  | Neutral                              | Female OR 0.56 (0.15–2.06), $p = 0.38$                                                                                                                                                                  | Abdominal aortic calcification (Kauppila score)                                                                        | [125] |
| Cai <i>et al.</i>             | China          | 2015 | 5D (HD)           | 129  | Neutral                              | Male OR 0.549 (0.113–2.661), $p = 0.456$                                                                                                                                                                | Lateral lumbar radiography                                                                                             | [129] |
| Sumida <i>et al.</i>          | Japan          | 2010 | 5D                | 135  | Neutral                              | Gender not associated with calcification                                                                                                                                                                | Carotid artery calcification by computed tomography                                                                    | [150] |
| Gruppen <i>et al.</i>         | Dutch          | 2003 | 5D                | 140  | Neutral                              | Male $p > 0.05$                                                                                                                                                                                         | Aortic valve calcification on ultrasound                                                                               | [135] |
| Sharma <i>et al.</i>          | United Kingdom | 2007 | 5D                | 140  | Neutral                              | Female OR 0.45 (0.16–0.81), $p = 0.53$                                                                                                                                                                  | Mitral annular calcification by cardiac ultrasound                                                                     | [147] |
| Muntner <i>et al.</i>         | United States  | 2007 | 5D (HD)           | 148  | Neutral                              | Prevalence rate ratio 1.37 (0.72–2.62)                                                                                                                                                                  | Coronary artery calcification (Agatston score)                                                                         | [123] |

|                         |             |      |         |     |                                                              |                                                                                                             |                                                                                                                        |       |
|-------------------------|-------------|------|---------|-----|--------------------------------------------------------------|-------------------------------------------------------------------------------------------------------------|------------------------------------------------------------------------------------------------------------------------|-------|
| Jean <i>et al.</i>      | France      | 2009 | 5D (HD) | 161 | Neutral                                                      | Female OR 0.79 (0.3 – 1.8), $p = 0.5$                                                                       | Multi-site plain radiography involving pelvis, lumbar, knee, right hand, right arm, chest, skull, and orthopantomogram | [67]  |
| Nishizawa <i>et al.</i> | Japan       | 2015 | 5D (HD) | 207 | Neutral                                                      | Male $\beta = -0.095$ , $p = 0.174$                                                                         | Coronary artery calcification (Agatston score)                                                                         | [141] |
| Coll <i>et al.</i>      | Spain       | 2011 | 5D      | 232 | Neutral                                                      | Male OR 1.57 (0.69–3.55), $p = 0.27$                                                                        | Vascular ultrasound for carotid, femoral, or brachial arteries                                                         | [47]  |
| Fusaro <i>et al.</i>    | Italy       | 2015 | 5D (HD) | 314 | Neutral                                                      | Male OR 1.52 (0.87–2.66), $p = 0.1$                                                                         | Lateral lumbar radiography                                                                                             | [133] |
| Nitta <i>et al.</i>     | Japan       | 2018 | 5D (HD) | 216 | Female at risk                                               | Female $\beta = 0.137$ (0.021–0.254), $p = 0.0206$                                                          | Aortic arch calcification on chest radiography                                                                         | [90]  |
| Maia <i>et al.</i>      | Brazil      | 2018 | 5D (HD) | 309 | Female at risk                                               | Female prevalence ratio 2.004 (1.012 – 3.966)                                                               | Carotid artery calcification on panoramic radiographs                                                                  | [120] |
| Oprisiu <i>et al.</i>   | France      | 2002 | 5D (HD) | 24  | Male at risk progression                                     | Male gender significant correlation with calcification progression                                          | Pelvic and lumbar lateral radiography                                                                                  | [143] |
| Jung <i>et al.</i>      | South Korea | 2006 | 5D (HD) | 40  | Male at risk for progression                                 | For calcification progression, male $\beta = 1.365$ , $p = 0.04$                                            | Coronary artery calcification (Agatston score)                                                                         | [155] |
| Nakayama <i>et al.</i>  | Japan       | 2013 | 5D (HD) | 47  | Male at risk                                                 | Female $\beta = -0.407$ , $p = 0.014$                                                                       | Abdominal aortic calcification by computed tomography                                                                  | [140] |
| Yamada <i>et al.</i>    | Japan       | 2008 | 5D (HD) | 49  | Male at risk                                                 | Female $\beta = -0.178$ , $p = 0.0345$                                                                      | Digital artery calcification by hand radiography                                                                       | [154] |
| Ho <i>et al.</i>        | Taiwan      | 2019 | 5D      | 61  | Male at risk                                                 | Male $\beta = 1688.01$ , $p = 0.02$                                                                         | Coronary artery calcification (Agatston score)                                                                         | [136] |
| Wang <i>et al.</i>      | China       | 2014 | 5D (HD) | 77  | Male at risk                                                 | female OR 0.21 (0.07–0.58), $p = 0.003$                                                                     | Coronary artery calcification (Agatston score)                                                                         | [126] |
| Moldovan <i>et al.</i>  | Romania     | 2011 | 5D (HD) | 81  | Male at risk                                                 | Male OR 7.226 (1.138–45.882), $p = 0.036$                                                                   | Plain radiography of pelvis and hands (Adragao score)                                                                  | [122] |
| Jansson <i>et al.</i>   | Sweden      | 2019 | 3-4     | 84  | Neutral for overall risk but male at risk for severe disease | Among total cohort, male not associated with AAC<br>Among those with AAC, male $\beta = 0.413$ , $p = 0.03$ | Abdominal aortic calcification by computed tomography                                                                  | [65]  |
| Jankovic <i>et al.</i>  | Serbia      | 2017 | 5D (HD) | 90  | Male at risk and for severe disease                          | For VC presence, female OR 0.134 (0.04–0.45), $p = 0.001$                                                   | Forearm AVF plain radiography                                                                                          | [63]  |

|                          |                          |      |         |     |                                                     |                                                                                                                                                     |                                                                                                                                 |       |
|--------------------------|--------------------------|------|---------|-----|-----------------------------------------------------|-----------------------------------------------------------------------------------------------------------------------------------------------------|---------------------------------------------------------------------------------------------------------------------------------|-------|
|                          |                          |      |         |     |                                                     | For VC severity, female $\beta = -0.432$ (-4.41– -1.86), $p < 0.001$                                                                                |                                                                                                                                 |       |
| Jankovic <i>et al.</i>   | Serbia                   | 2015 | 5D (HD) | 90  | Male at risk for severe disease                     | Composite calcification score, female $\beta = -0.432$ , $p < 0.001$                                                                                | Plain radiography of pelvis and hands (Adragao score) + forearm AVF plain radiography                                           | [64]  |
| Mazzaferro <i>et al.</i> | Italy                    | 2007 | 5D, 5T  | 100 | Male at risk                                        | Male OR 10.5 (3.2–34.4), $p < 0.0001$                                                                                                               | Coronary artery calcification (Agatston score)                                                                                  | [84]  |
| Adragao <i>et al.</i>    | Portugal                 | 2004 | 5D (HD) | 123 | Male at risk for severe disease                     | Score $\geq 3$ OR 7.47 (2.9–19.1)                                                                                                                   | Plain radiography of pelvis and hands (Adragao score)                                                                           | [113] |
| Tamei <i>et al.</i>      | Japan                    | 2011 | 5D (HD) | 127 | Male at risk for progression                        | Progression at 5-yr, male $\beta = 0.969$ , $p = 0.0192$                                                                                            | Aortic arch calcification by chest radiography                                                                                  | [151] |
| Bellasi <i>et al.</i>    | United States            | 2008 | 5D      | 142 | Male at risk (subgroup)                             | For coronary artery calcification, male $\beta = 735.82$ , $p = 0.0366$<br>For thoracic aorta calcification, gender $p > 0.05$                      | Coronary artery calcification (Agatston score) and thoracic aorta calcification                                                 | [127] |
| Okamoto <i>et al.</i>    | Japan                    | 2018 | 5D (HD) | 184 | Male at risk for progression                        | Male OR 3.29 (1.27–8.53), $p = 0.014$                                                                                                               | Abdominal aorta calcification by computed tomography                                                                            | [93]  |
| Turan <i>et al.</i>      | Turkey                   | 2013 | 5D (HD) | 191 | Male at risk                                        | Male RR 2.79 (1.30–5.98), $p = 0.008$                                                                                                               | Coronary artery calcification (Agatston score)                                                                                  | [152] |
| Schlieper <i>et al.</i>  | Serbia                   | 2009 | 5D (HD) | 194 | Male at risk                                        | For composite score, male OR 2.32 (1.19–4.52), $p = 0.014$<br>For Adragao score, male OR 2.75 (1.41–5.38), $p = 0.003$                              | Plain radiography of pelvis and hands (Adragao score) + forearm AVF plain radiography + Cardiac ultrasound + Carotid ultrasound | [146] |
| Raggi <i>et al.</i>      | United States and Europe | 2002 | 5D (HD) | 205 | Differential effect depending on calcification site | For coronary artery calcification, female $\beta = -0.587547$ , $p = 0.0167$<br>For aortic calcification, female $\beta = -0.044508$ , $p = 0.9036$ | Coronary artery calcification (Agatston score) and aortic calcification by computed tomography                                  | [145] |
| Schlieper <i>et al.</i>  | Serbia                   | 2008 | 5D (HD) | 212 | Male at risk                                        | Male OR 5.08 (2.18–11.86), $p = 0.0001$                                                                                                             | Vascular access calcification on plain radiography                                                                              | [100] |
| Turan <i>et al.</i>      | Turkey                   | 2016 | 5D (HD) | 224 | Male at risk                                        | Male RR 4.14 (2.01–8.51), $p < 0.001$                                                                                                               | Coronary artery calcification (Agatston score)                                                                                  | [106] |
| Chen <i>et al.</i>       | Sweden                   | 2017 | 5D, 5T  | 240 | Male at risk                                        | $\beta = 0.35$ , $p = 0.008$                                                                                                                        | Coronary artery calcification (Agatston score)                                                                                  | [40]  |
| Nishizawa <i>et al.</i>  | Japan                    | 2005 | 5D (HD) | 332 | Male at risk                                        | Male OR 3.380 (1.289–8.860), $p = 0.0019$                                                                                                           | Digital artery calcification by hand radiography                                                                                | [142] |

|                        |             |      |         |     |                                                     |                                                                                                                                                                  |                                                                                                         |       |
|------------------------|-------------|------|---------|-----|-----------------------------------------------------|------------------------------------------------------------------------------------------------------------------------------------------------------------------|---------------------------------------------------------------------------------------------------------|-------|
| Floege <i>et al.</i>   | Multicenter | 2010 | 5D (HD) | 360 | Male at risk for severe disease                     | Male $\beta = 0.426, p = 0.0011$                                                                                                                                 | Coronary artery calcification (Agatston score)                                                          | [117] |
| Ishimura <i>et al.</i> | Japan       | 2002 | 5D (HD) | 421 | Male at risk (subgroup)                             | In diabetics, male OR 3.38 (1.289-8.860), $p = 0.0019$<br>In non-diabetics, male OR 1.328 (0.252-6.997), $p = 0.7376$                                            | Digital artery calcification by hand radiography                                                        | [138] |
| Ishimura <i>et al.</i> | Japan       | 2004 | 5D (HD) | 594 | Male at risk                                        | For aortic calcification, male OR 2.339 (1.466-3.732), $p = 0.0004$<br>For hand artery calcification, male OR 1.857 (1.043-3.306), $p = 0.0355$                  | Plain radiography of lateral abdomen and hand                                                           | [137] |
| <i>Stage 5T</i>        |             |      |         |     |                                                     |                                                                                                                                                                  |                                                                                                         |       |
| Miyatake <i>et al.</i> | Japan       | 2020 | 5T      | 50  | Neutral                                             | Female $\beta = -0.051, p = 0.741$                                                                                                                               | Abdominal aortic calcification by computed tomography                                                   | [86]  |
| Qureshi <i>et al.</i>  | Sweden      | 2015 | 5T      | 89  | Differential effect depending on calcification site | For epigastric artery, male RR 1.82 (1.03-1.16), $p = 0.03$<br>For coronary artery, male RR 0.83 (0.38-1.81), $p = 0.63$                                         | Biopsy-verified calcification in epigastric arteries and coronary artery calcification (Agatston score) | [95]  |
| Shu <i>et al.</i>      | Taiwan      | 2012 | 5T      | 99  | Male at risk                                        | Female $\beta = -1.61, p = 0.0021$                                                                                                                               | Coronary artery calcification (Agatston score)                                                          | [101] |
| Maréchal <i>et al.</i> | Belgium     | 2012 | 5T      | 197 | Differential effect depending on calcification site | For coronary calcification, female progression, $p > 0.05$<br>For thoracic aortic calcification, female progression $\beta = -0.09 (-0.17 \sim -0.01), p = 0.03$ | Coronary artery calcification (Agatston score) and thoracic artery calcification by computed tomography | [121] |
| Evenpoel <i>et al.</i> | Belgium     | 2015 | 5T      | 268 | Male at risk                                        | For coronary calcification, female $\beta = -0.64, p < 0.0001$<br>For thoracic aortic calcification, female $\beta = -0.32, p = 0.008$                           | Coronary artery calcification (Agatston score) and thoracic aortic calcification                        | [130] |

AAC, abdominal aortic calcification; AVF, arteriovenous fistula; CKD, chronic kidney disease; HD, hemodialysis; OR, odds ratio; RR, relative risk; VC, vascular calcification
